# Supplementary material
Source: PubMed Central journal article supplement (PMC8276268)
Supplement: NIHMS1718143-supplement-Supplementary_Table_S1.pdf [file NIHMS1718143-supplement-Supplementary_Table_S1.pdf]

**Table S1. Templates and primers for PCR to engineer ABCG2 domain constructs**

| Constructs    | Template         | Primer name                                                | Primer Sequence                                                                 |
|---------------|------------------|------------------------------------------------------------|---------------------------------------------------------------------------------|
| Myc-TM1-2/L1* | Myc-TM5-6 (PCR1) | P1                                                         | 5'-CGCGGATCCGCCGCCATGGAACAAAAGCTCATCTCAGAAGAAGATCTGTCTTCCAGTAATGTGC-3'          |
|               |                  | P2                                                         | 5'-TTAGAGTGTGGTAACGTTAGCCCAAAGTAAAT-3'                                          |
|               | Myc-TM1-2 (PCR2) | P3                                                         | 5'-AATCTCACAAACCATTGCA-3'                                                       |
|               |                  | P4                                                         | 5'-GTGATTCTTCCACAACCTTCTTCTCCTGACGACCAACCAGTGTTCAGCAGTGTTCAGCCGTGGAACCTTTGTG-3' |
|               | PCR1 and PCR2    | P1                                                         | Same as above                                                                   |
| P5            |                  | 5'-CCGGAATTCCACAAAGAGTTCACGGCTGA-3'                        |                                                                                 |
| Myc-TM5*6*    | Myc-TM5-6 (PCR1) | P6                                                         | 5'-CCTGGCCATAGCAGCAGGTCAGAGTGTGGTTTCTATAGCTCAGATCATT-3'                         |
|               |                  | P7                                                         | 5'-TTAGAGTGTGGTAACGTTAGCCCAAAGTAAAT-3'                                          |
|               | Myc-TM1-2 (PCR2) | P3                                                         | Same as above                                                                   |
|               |                  | P4                                                         | Same as above                                                                   |
|               | PCR1 and PCR2    | P6                                                         | Same as above                                                                   |
| P8            |                  | 5'-CCGGAATTCTTAAGAATATTTTTTAAGAAATAACAATTCACAAAGAGTTCAC-3' |                                                                                 |
| Myc-ECL3*     | Myc-TM5-6 (PCR1) | P9                                                         | 5'-CCTGGCCATAGCAGCAGGTCAGAGTGTGGTTTCTGTAGCAACACTTCTCATG-3'                      |
|               |                  | P10                                                        | 5'-AGTAGAATCATTTTTGACCAACAGACCTGAAAA-3'                                         |
|               | Myc-TM1-2 (PCR2) | P11                                                        | 5'-AAAAATGATTCTACTGGAATCCAGAACAGAGCTGGGGTTGTGGCCTTGGCTTGTATGATTGT-3'            |
|               |                  | P12                                                        | 5'-CCGGAATTCTTAAGAATATTTTTTAAGAAATAACAATTCAGGTAGGC-3'                           |
|               | PCR1 and PCR2    | P9                                                         | Same as above                                                                   |
| P12           |                  | Same as above                                              |                                                                                 |
| Myc-L3*TM6*   | Myc-TM5-6 (PCR1) | P9                                                         | Same as above                                                                   |
|               |                  | P10                                                        | Same as above                                                                   |
|               | Myc-TM1-2 (PCR2) | P13                                                        | 5'-AAAAATGATTCTACTGGAATCCAGAACAGAGCTGGGGTT-3'                                   |
|               |                  | P8                                                         | Same as above                                                                   |
|               | PCR1 and PCR2    | P9                                                         | Same as above                                                                   |
| P8            |                  | Same as above                                              |                                                                                 |
| Myc-TM5*L3*   | Myc-TM5-6 (PCR1) | P6                                                         | Same as above                                                                   |
|               |                  | P14                                                        | 5'-TCTGTTCTGGATTCCAGTAGAATCATTTTTAGCCCAAAGTA-3'                                 |
|               | Myc-TM1-2 (PCR2) | P11                                                        | Same as above                                                                   |
|               |                  | P12                                                        | Same as above                                                                   |
|               | PCR1 and PCR2    | P6                                                         | Same as above                                                                   |
| P12           |                  | Same as above                                              |                                                                                 |
